# Supplementary material for: A stable polypyridinopyridine–red phosphorus composite as a superior anode material for long-cycle lifetime lithium-ion batteries
Source: Royal Society of Chemistry journal article supplement (doi:10.1039/c9nj00394k), 2019-01-01
Supplement: c9nj00394k1.pdf [file c9nj00394k1.pdf]

## Supplementary Information

### Stable Polypyridinopyridine-Red Phosphorus Composite as a Superior Anode for Long-Cycling Lithium-Ion Batteries

Xibang Chen<sup>a</sup>, Jingyi Qiu<sup>b</sup>, Yimeng Wang<sup>a</sup>, Furong Huang<sup>a</sup>, Jing Peng<sup>a</sup>, Yonggang Liu<sup>b</sup>, Jiuqiang Li<sup>a</sup>, Maolin  
Zhai<sup>a\*</sup>

<sup>a</sup>Beijing National Laboratory for Molecular Sciences, Radiochemistry and Radiation Chemistry Key  
Laboratory of Fundamental Science, the Key Laboratory of Polymer Chemistry and Physics of the  
Ministry of Education, College of Chemistry and Molecular Engineering, Peking University, Beijing  
100871, China

<sup>b</sup>Institute of Chemical Defense, Beijing 100191, China

**Table S1** FTIR wavenumbers (cm<sup>-1</sup>) and assignments for PAN, RP, PPyPy, PPyPy-RP and PPyPy/RP, respectively.

| Wave number (cm <sup>-1</sup> ) | Bonds           | Wave number (cm <sup>-1</sup> ) | Bonds     |
|---------------------------------|-----------------|---------------------------------|-----------|
| 2942.0                          | C - H           | 1245.5                          | C = N     |
| 2245.5                          | C ≡ N           | 1075.1                          | P - O     |
| 1630.0                          | C = C           | 1040.2                          | P- P      |
| 1451.9                          | CH <sub>2</sub> | 978.7                           | P - O - C |
| 1385.3                          | P = O           | 652.4                           | P - C     |
| 1361.5                          | C - C           | 503.4                           | P- C=N    |

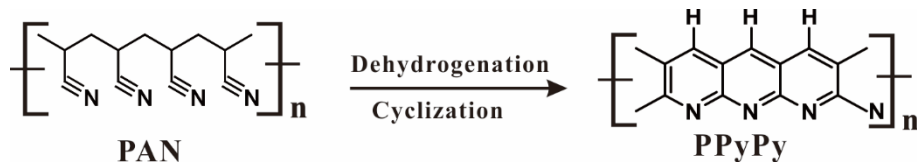

**Fig. S1** Schematic illustration of the formation of PPyPy from PAN under dehydrogenation and cyclization process

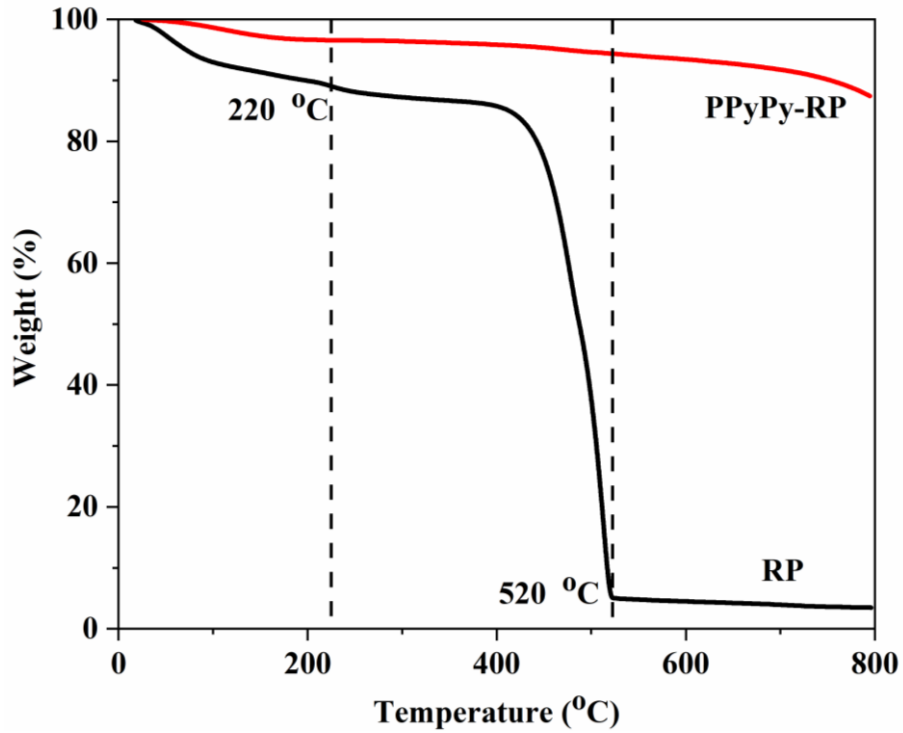

**Fig. S2** TGA curves of the PPyPy-RP and pure red phosphorus. The content of pure phosphorus in the PPyPy-RP

calculated from the TGA is 1.9 wt%. This analysis was taken in  $\text{N}_2$  atmosphere with a heating rate of  $10 \text{ }^\circ\text{C min}^{-1}$ .

To calculate the specific capacity contribution of phosphorus in the electrodes, a formula can be carried out as:

$$C_p = (C_c - C'_s) / W_p \quad (1)$$

where the capacity contribution of Substrate in the electrode is calculated by the following equation as:

$$C'_s = C''_s \times W_s \quad (2)$$

Where the  $C_c$  and  $C''_s$  are the capacity of Composite and Substrate, while  $W_p$  and  $W_s$  are the percentage of Phosphorus and Substrate, respectively.

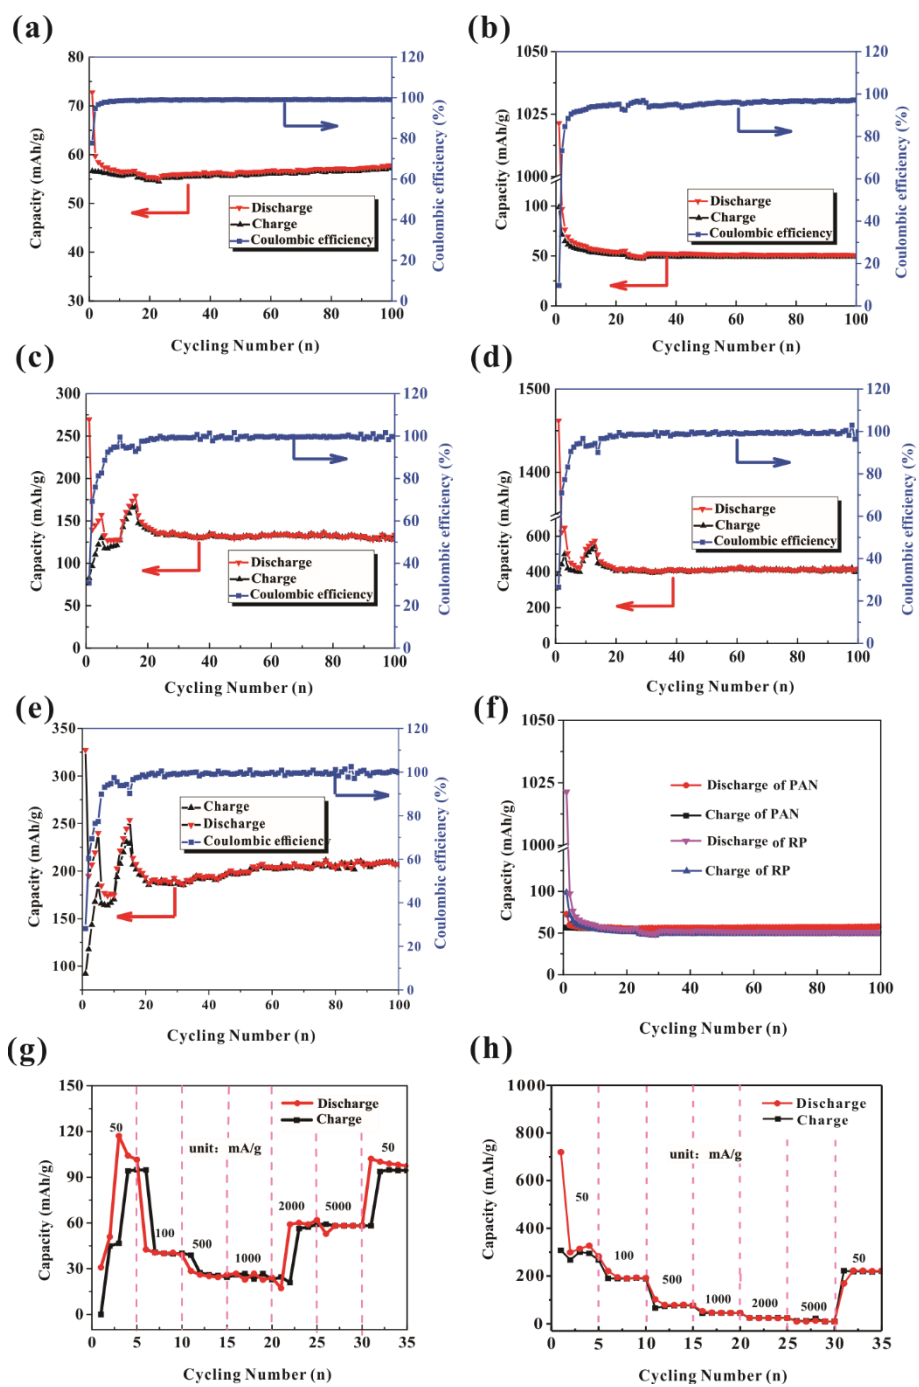

**Fig. S3** Cycling stability and Coulombic efficiency of corresponding electrode for LIBs cycled 100 cycles at a current density of 100 mA/g; PAN (a), RP (b), PPyPy (c), PPyPy/RP (d), acetylene black (e); Compare discharge/charge capacities of PAN and RP at a current density of 100 mA/g (f); Rate capabilities of PAN (g) and AC (h) electrode for LIBs cycled at various current densities.

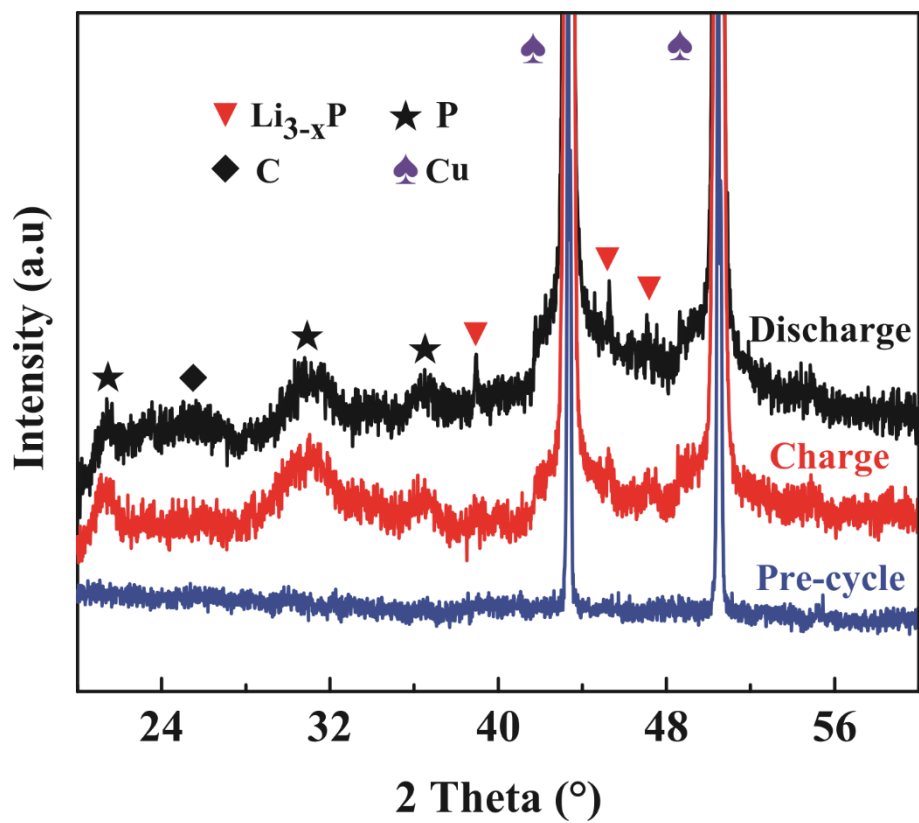

Fig. S4 The XRD patterns with the corresponding pre-cycle and first charge–discharge of PPyPy-RP as anode of LIBs;

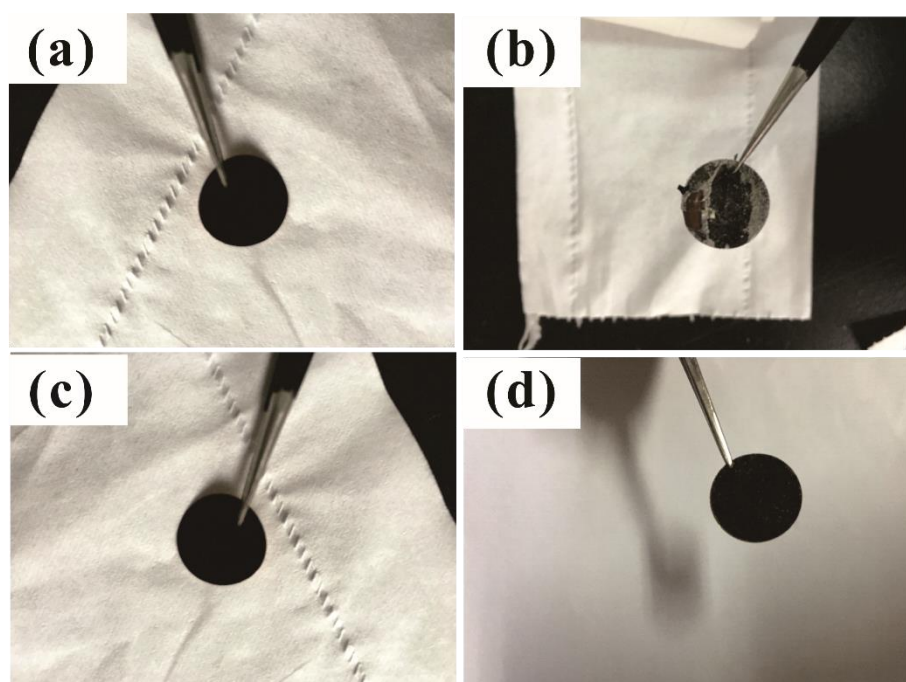

Fig. S5 The photographs of RP electrode and PPyPy-RP electrode after different discharge. Pre-cycle RP electrode (a) and after

100 th discharge (b); Pre-cycle PPyPy-RP electrode (c) and after 2000 th discharge (d)

**Table S2** The  $R_e$ ,  $R_f$ , and  $R_{ct}$  were obtained by fitting experimental data using the corresponding equivalent circuit (Figure. 6c) for

RP, PPyPy, PPyPy-RP and PPyPy/RP cell pre-cycling.

|          | $R_e$ ( $\Omega$ ) | $R_f$ ( $\Omega$ ) | $R_{ct}$ ( $\Omega$ ) |
|----------|--------------------|--------------------|-----------------------|
| RP       | 1.53               | 147                | 140                   |
| PPyPy    | 1.23               |                    | 72.5                  |
| PPyPy-RP | 1.73               |                    | 77.0                  |
| PPyPy/RP | 1.68               | 61.7               | 27.5                  |

**Table S3** The  $R_e$ ,  $R_f$ , and  $R_{ct}$  were obtained by fitting experimental data using the corresponding equivalent circuit (Figure. 5c)

for PPyPy-RP cell after different cycles.

|                    | $R_e$ ( $\Omega$ ) | $R_f$ ( $\Omega$ ) | $R_{ct}$ ( $\Omega$ ) |
|--------------------|--------------------|--------------------|-----------------------|
| Pre-cycle-PPyPy-RP | 1.73               |                    | 77.0                  |
| 1 st-PPyPy-RP      | 1.51               | 6.59               | 33.2                  |
| 20 th- PPyPy-RP    | 1.82               | 4.77               | 8.75                  |
| 100 th- PPyPy-RP   | 1.85               | 21.3               | 16.4                  |

**Table S4** Electrochemical performance of phosphorus–carbon composites in lithium half-cells

| Electrode material    | Current density | <i>Initial Coulombic</i> | Reversible capacity                       | Reference |
|-----------------------|-----------------|--------------------------|-------------------------------------------|-----------|
|                       | (mA/g)          | <i>Efficiency (%)</i>    | (mAh/g <sub>phosphorus</sub> )<br>/Cycles |           |
| P/CNTs                | 130             | 74.3                     | 998.5/50                                  | [1]       |
| P/graphite (P-C bond) | 500             | 85.5                     | 1849/100                                  | [2]       |
| P/Carbon Matrix       | 300             | 80                       | 1370/100                                  | [3]       |
| P-Graphene            |                 |                          |                                           |           |
| Nanosheet             | 130             | 84                       | 1283/300                                  | [4]       |
| P/carbon              |                 |                          |                                           |           |
| cloth/graphene oxide  | 259.6           | 82.7                     | 910/200                                   | [5]       |
| Densely Packed        |                 |                          |                                           |           |
| Phosphorene–          |                 |                          |                                           |           |
| Graphene              | 500             | 60.2                     | 725/200                                   | [6]       |
|                       | 100             | 86.2                     | 1870.2/100                                |           |
| PPyPy-RP              | 1000            | 84.4                     | 1632.8/800                                | This work |
|                       | 5000            | 67.9                     | 518.3/2000                                |           |

## References

- [1] Y. Kim, Y. Park, A. Choi, N. S. Choi, J. Kim, J. Lee, J. H. Ryu, S. M. Oh and K. T. Lee, *Adv. Mater.*, 2013, **25**, 3045-3049.
- [2] J. Sun, G. Zheng, H. W. Lee, N. Liu, H. Wang, H. Yao, W. Yang and Y. Cui, *Nano Lett.*, 2016, **14**, 4573-4580.
- [3] J. Li, L. Wang, X. He and J. Wang, *ACS Sustainable Chemistry & Engineering*, 2016, **4**, 4217-4223.
- [4] Z. Yu, J. Song, M. L. Gordin, R. Yi, D. Tang and D. Wang, *Adv Sci (Weinh)*, 2015, **2**, 1400020.
- [5] Y. Du, Y. Tang and C. Chang, *J. Electrochem. Soc.*, 2016, **163**, A2938-A2942.
- [6] Y. Zhang, X. Rui, Y. Tang, Y. Liu, J. Wei, S. Chen, W. R. Leow, W. Li, Y. Liu, J. Deng, B. Ma, Q. Yan and X. Chen, *Adv. Energy Mater.*, 2016, **6**, 1502409.
